# Supplementary material
Source: MDPI journal article supplement (https://www.mdpi.com/2073-4344/7/9/272)
Supplement: s1 [file s1]

## Supporting Information

### The Catalytic Hydrogenation of Maleic Anhydride on CeO<sub>2-δ</sub> Supported Transition Metal Catalysts

Xin Liao<sup>1,2</sup>, Yin Zhang<sup>1</sup>, Junqiu Guo<sup>2</sup>, Lili Zhao<sup>1</sup>, Martyn Hill<sup>2</sup>, Zheng Jiang<sup>1,2\*</sup>, Yongxiang Zhao<sup>1,\*</sup>

<sup>1</sup> Engineering Research Center of Ministry of Education for Fine Chemicals, School of Chemistry and Chemical Engineering, Shanxi University, Taiyuan 030006, China; e-mail@e-mail.com

<sup>2</sup> Faculty of Engineering and the Environment, University of Southampton, Highfield, Southampton, SO17 1BJ, U.K.

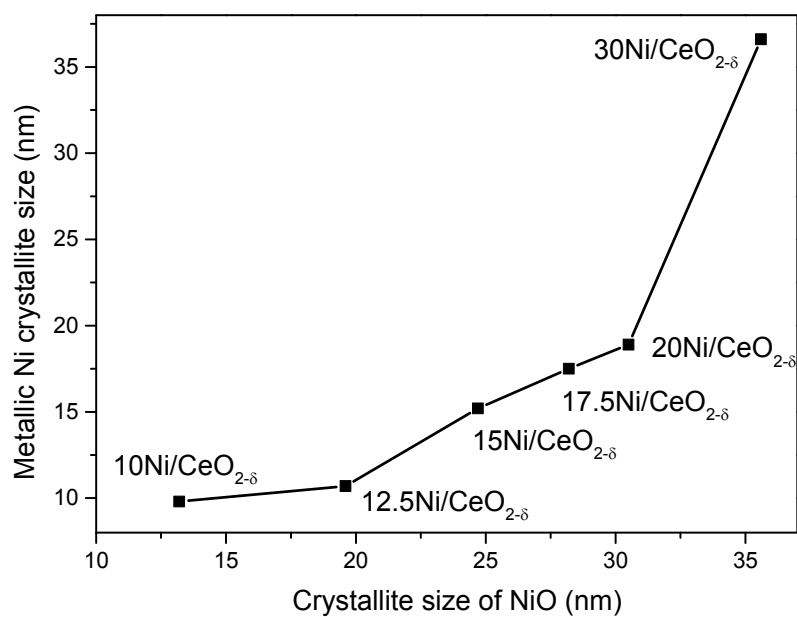

**Figure S1.** The dependence of metal crystallite sizes on those of metal oxides in the xNi/CeO<sub>2-δ</sub> catalysts (x represents the loading amount (wt%) of Ni in the xNi/CeO<sub>2-δ</sub> catalysts).
